# Supplementary material for: Sustainable nitrogen-doped carbon dots from biomass for ultrasensitive and selective fluorescent detection of isoliquiritigenin
Source: Royal Society of Chemistry journal article supplement (doi:10.1039/d5ra07665j), 2025-01-01
Supplement: d5ra07665j1.pdf [file d5ra07665j1.pdf]

## **Electronic Supplementary Material**

### **Sustainable nitrogen-doped carbon dots from biomass for ultrasensitive and selective fluorescent detection of isoliquiritigenin**

**Glowi Alasiri<sup>a</sup>, Ali M. Alaseem<sup>b</sup>, Ramadan Ali<sup>c</sup>, Al-Montaser Bellah H. Ali<sup>d</sup>, Mohamed M.**

**El-Wakil<sup>d\*</sup>**

<sup>a</sup> Department of Biochemistry, College of Medicine, Imam Mohammad Ibn Saud Islamic University (IMSIU), Riyadh, 13317, Saudi Arabia.

<sup>b</sup> Department of Pharmacology, College of Medicine, Imam Mohammad Ibn Saud Islamic University (IMSIU), Riyadh, Saudi Arabia

<sup>c</sup> Department of Pharmaceutical Chemistry, Faculty of Pharmacy, University of Tabuk, Tabuk 71491, Saudi Arabia

<sup>d</sup> Department of Pharmaceutical Analytical Chemistry, Faculty of Pharmacy, Assiut University, Assiut, 71526, Egypt

#### **Correspondence**

**\* mohamed.elwakeel@pharm.aun.edu.eg, mohamed.mohamoud@ymail.com**

## Fluorescence quantum yield measurements of NCDs

Quantum yields ( $\Phi_X$ ) were determined relative to quinine sulfate standard (QY = 54% in  $H_2SO_4$  at 310 nm) under identical instrumental settings. To avoid inner-filter effects, sample and reference absorbance values were kept below 0.05 at 310 nm. Emission spectra were integrated over the full fluorescence band (corrected for instrument response), and the following relation was applied:

$$\phi_X = \phi_s \times \frac{F_{NCDs}}{F_S} \times \frac{A_S}{A_{NCDs}} \times \frac{\eta_{NCDs}}{\eta_S}$$

$\Phi_X$  represents the quantum yield of NCDs,  $\phi_s$  represents the quantum yield of quinine sulfate,  $F_X$  is the fluorescence intensity of NCDs,  $F_S$  is the fluorescence intensity of standard (S, quinine sulfate), A refers to the absorbance value and  $\eta$  refers to the refractive index of the solvent ( $H_2SO_4$ ). The synthesized NCDs were dissolved in distilled water ( $\eta = 1.33$ ) and S was dissolved in  $H_2SO_4$  ( $\eta = 1.33$ ).

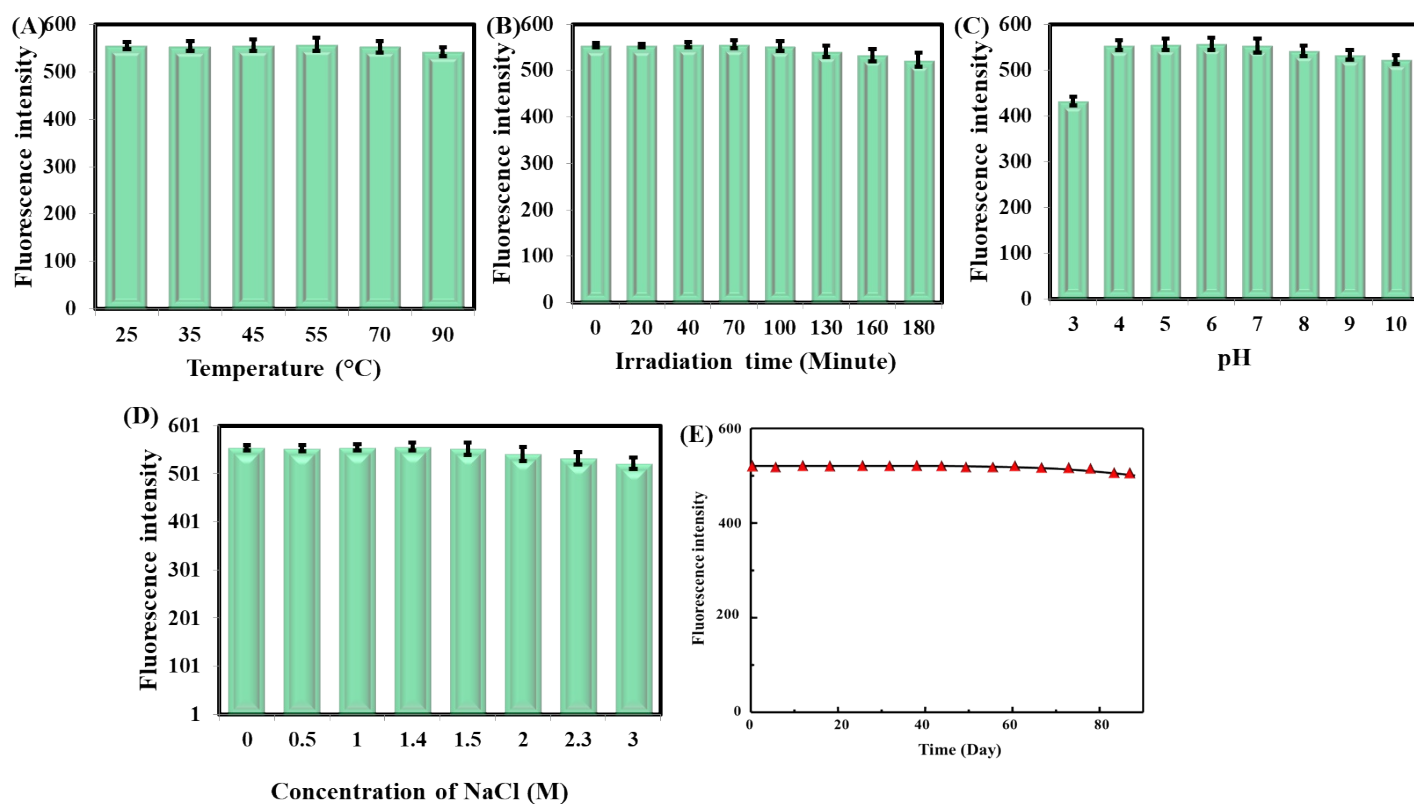

**Fig. S1** Stability of biowaste-derived NCDs after exposure to different conditions: (A) temperature, (B) irradiation time, (C) pH, (D) ionic strength, and (E) storage time. Each data point represents the mean  $\pm$  SD of three independent measurements (n = 3).

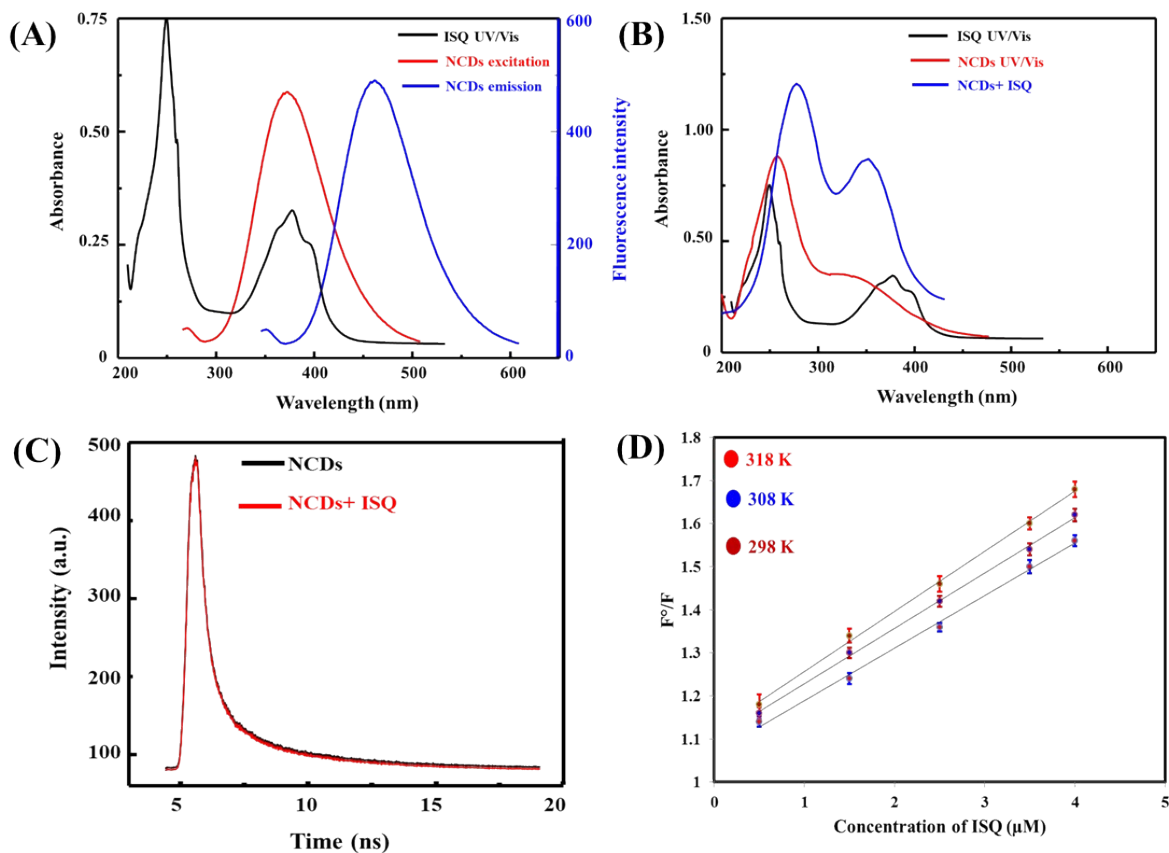

**Fig. S2** (A) UV-Vis absorption spectrum of ISQ and excitation/fluorescence emission spectra of NCDs; (B) UV-Vis absorption spectra of ISQ, NCDs, and NCDs + ISQ; (C) Fluorescence lifetime decay curves of NCDs before and after ISQ addition; (D) Stern-Volmer plots for NCDs with increasing ISQ concentrations at different temperatures.

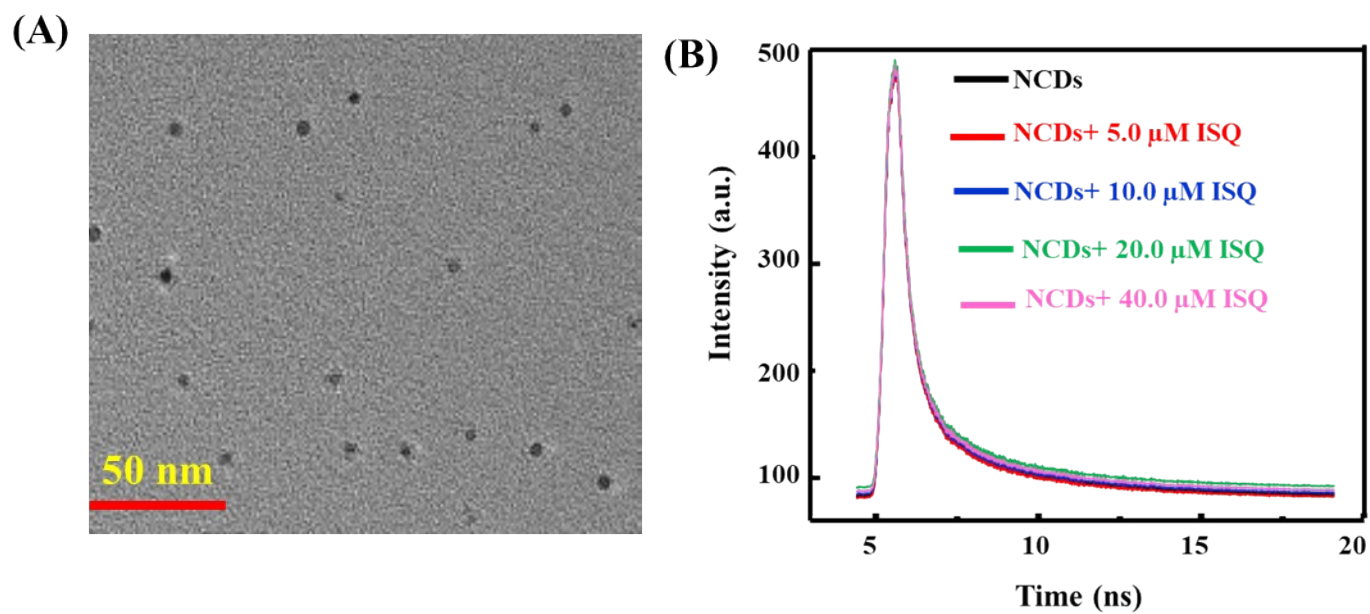

**Fig. S3** (A) TEM image of NCDs after interaction with 50  $\mu\text{M}$  ISQ and (B) Fluorescence lifetimes of NCDs before and after addition different amounts of ISQ.

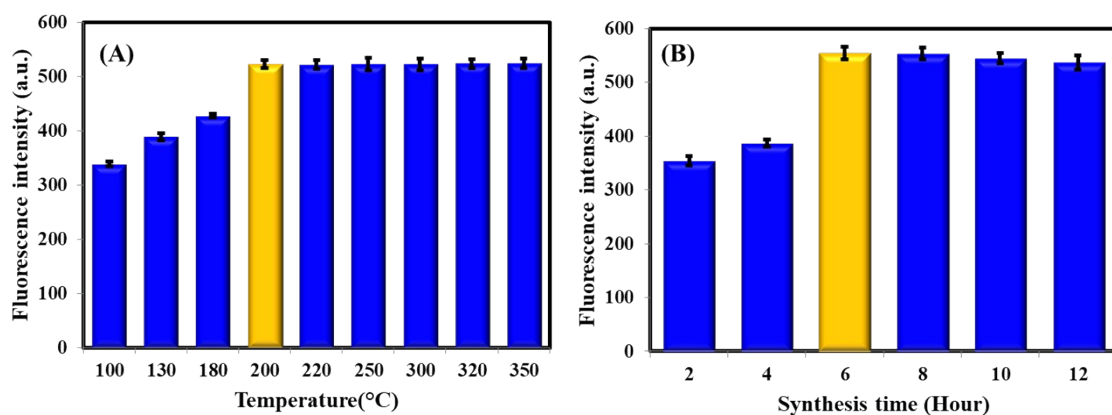

**Fig. S4** Influence of synthesis temperature (A) and time (B) on the fluorescence emission of biowaste-derived NCDs. Each data point represents the mean  $\pm$  SD of three independent measurements ( $n = 3$ ).

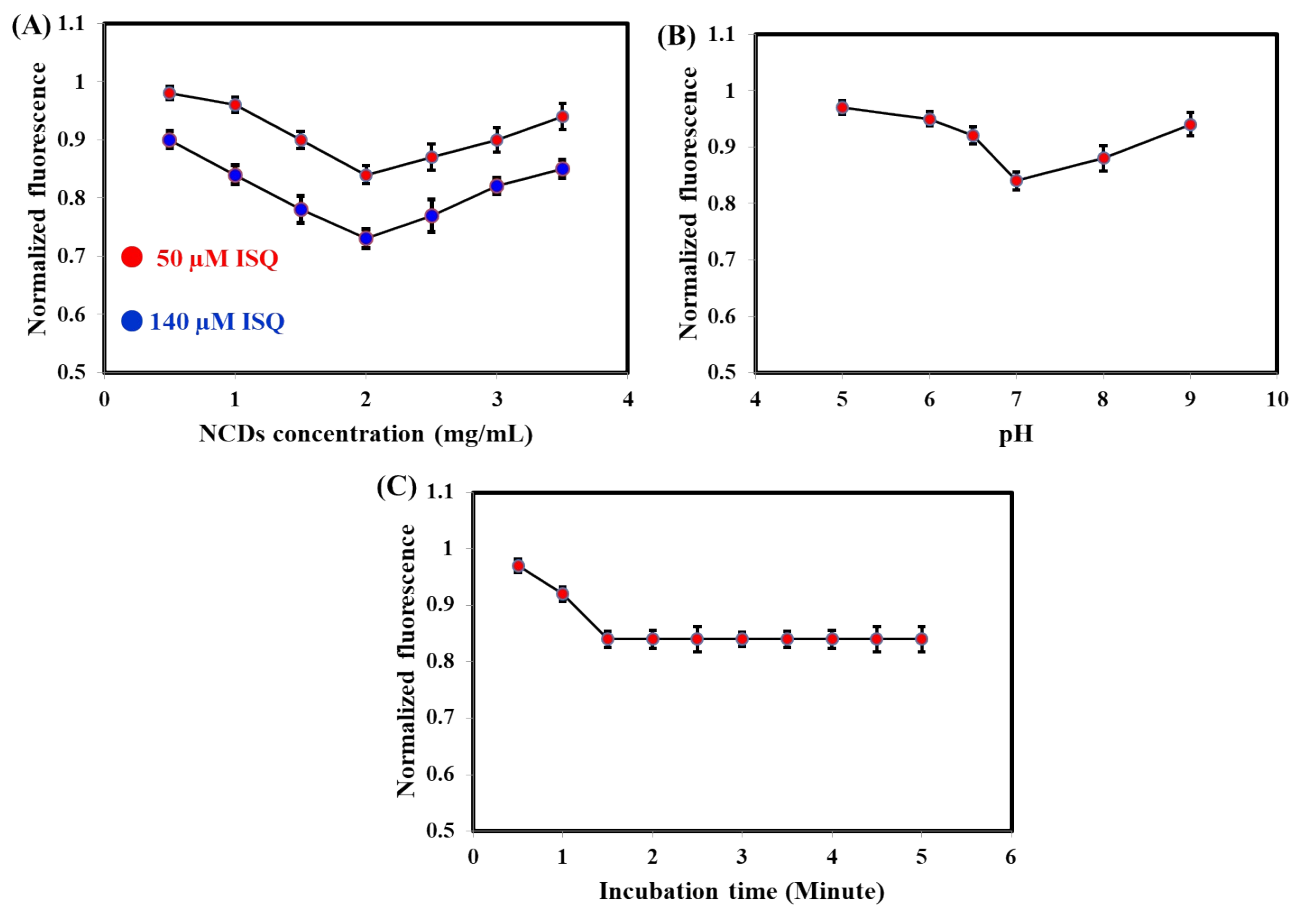

**Fig. S5** Influence of NCDs concentration (A) on the detection of 50 and 140  $\mu$ M ISQ, pH (B), and incubation time (C) on the detection of 50  $\mu$ M ISQ. Each data point represents the mean  $\pm$  SD of three independent measurements ( $n = 3$ ).

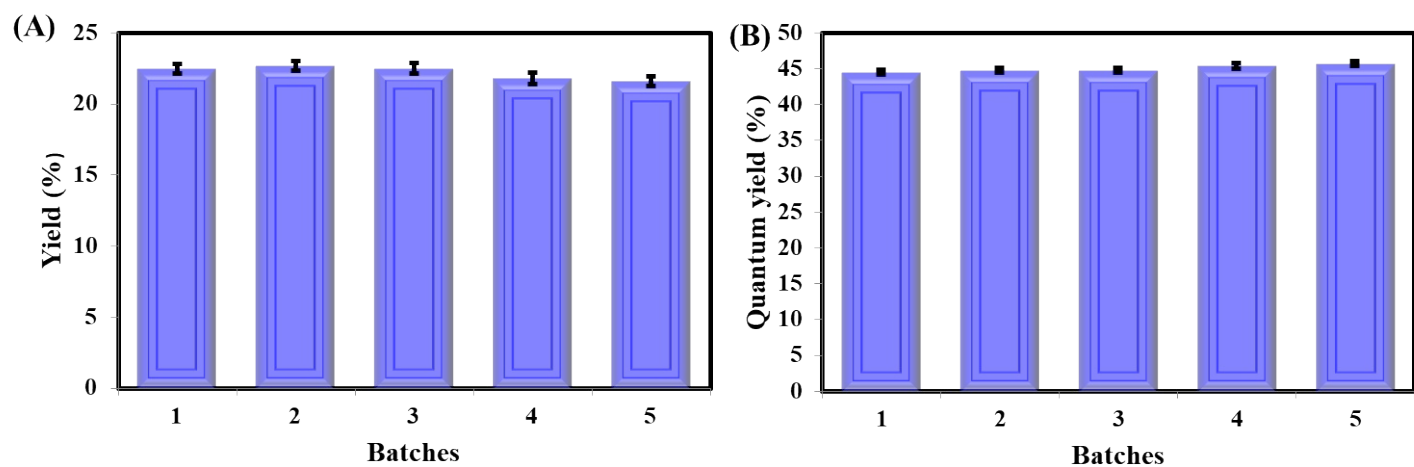

**Fig. S6** Batch-to-batch reproducibility and scalability of the as-prepared NCDs. Each data point represents the mean  $\pm$  SD of three independent measurements ( $n = 3$ ).



**Table S1** Batch-to-batch reproducibility and scalability of the as-prepared NCDs (n=3).

| Batch No. | Yield (%)  | Quantum yield (%) | Emission peak (nm) | Purity | Zeta potential (mV) |
|-----------|------------|-------------------|--------------------|--------|---------------------|
| 1         | 22.5± 0.14 | 44.2± 0.13        | 465± 0.08          | High   | -22.4± 0.14         |
| 2         | 21.8± 0.11 | 44.6± 0.15        | 466± 0.07          |        | -22.1±0.15          |
| 3         | 22.3± 0.15 | 44.8± 0.15        | 465± 0.08          |        | -22.5± 0.14         |
| 4         | 21.9± 0.12 | 44.5± 0.13        | 465± 0.09          |        | -22.3± 0.13         |
| 5         | 22.1± 0.13 | 44.7± 0.12        | 465± 0.08          |        | -22.6± 0.14         |

All batches synthesized under identical conditions (220 °C, 4 h, 5 g biomass, dialysis at 1000 Da, 30 mL water).

**Table S2** Comparative green metrics between NCDs and other techniques/sensors.

| Metric                       | HPLC                                | CE                    | NCDs<br>(this work)         | Other CDs                                          |
|------------------------------|-------------------------------------|-----------------------|-----------------------------|----------------------------------------------------|
| Energy per batch             | ~1.8–<br>2.5 kWh/run                | ~1.5 kWh/run          | ~1.0 kWh<br>(220 °C, 4 h)   | Varies (pyrolysis<br>~2–5 kWh)                     |
| Solvent use                  | High<br>(methanol,<br>acetonitrile) | Moderate              | None (aqueous)              | Some require<br>organic solvents<br>(solvothermal) |
| Hazardous waste              | Organic waste                       | Capillary<br>effluent | None                        | Depends on<br>feedstock                            |
| Biowaste valorized           | None                                | None                  | Potato peel (food<br>waste) | Varies                                             |
| Heavy metal/leaching<br>risk | Not applicable                      | Not<br>applicable     | None detected               | Risk if doped with<br>metals                       |
| Green chemistry<br>rating    | Low                                 | Medium                | High                        | Variable                                           |
